# Supplementary material for: Homburgvirus LP-018 Has a Unique Ability to Infect Phage-Resistant Listeria monocytogenes
Source: PubMed Central journal article supplement (PMC6950383; doi:10.3390/v11121166), 2019-12-17
Supplement: viruses-11-01166-s001.pdf [file viruses-11-01166-s001.pdf]

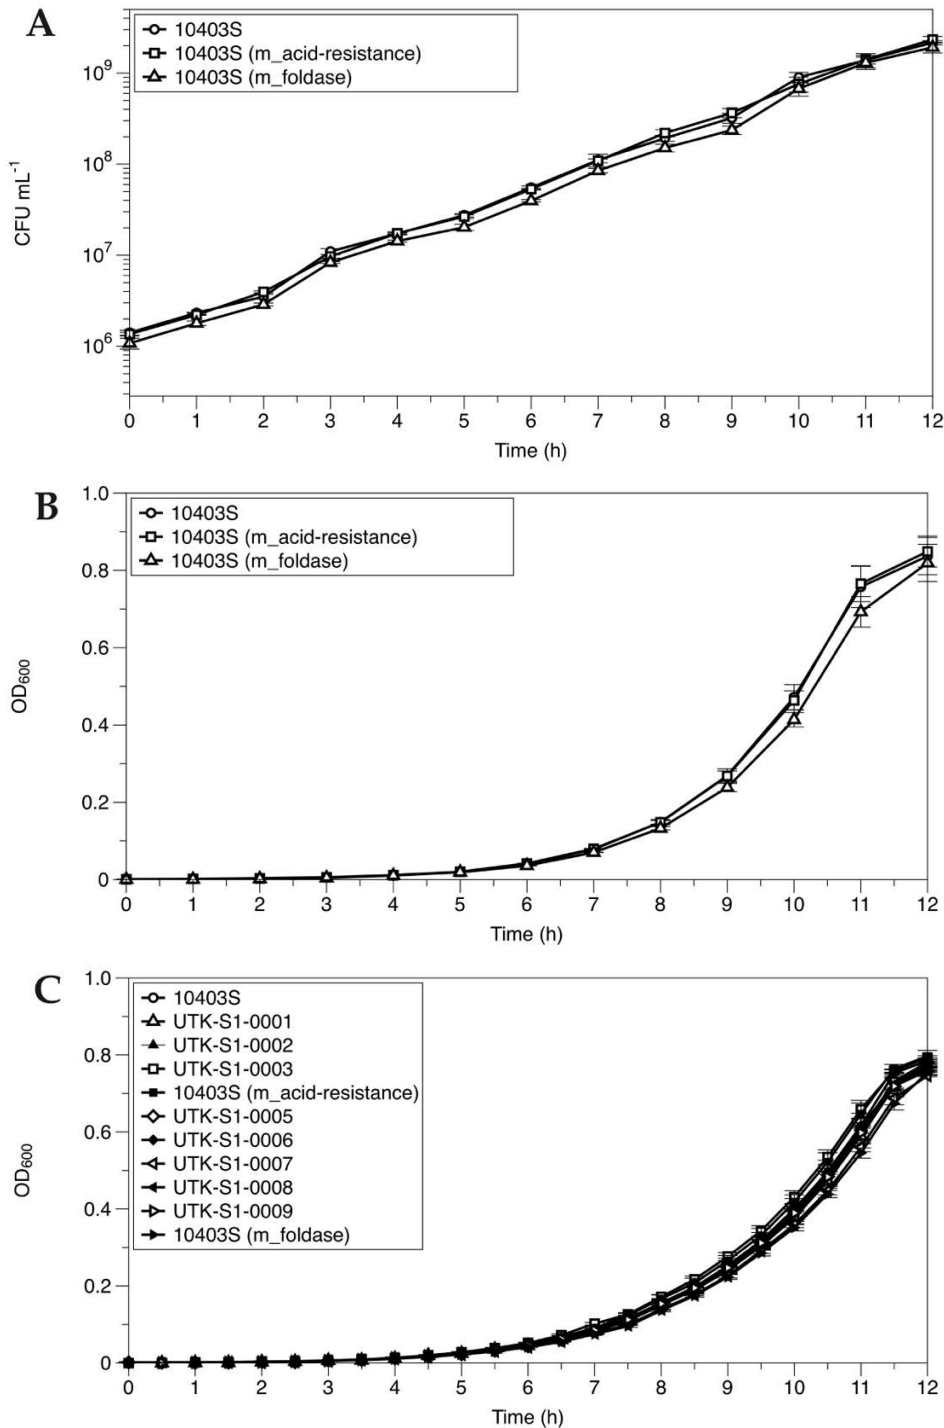

**Supplemental Figure S1.** Growth curve of 10403S, 10403S (m\_acid-resistance) and 10403S (m\_foldase) at 25°C. LB-MOPS was inoculated 1:100 with an overnight culture, grown to an OD<sub>600</sub> of 0.1 then diluted 1:100 and measured by (A) CFU mL<sup>-1</sup> or (B) OD<sub>600</sub> for 12 hours (data for A and B were collected from the same experiment). (C) Growth curve of 10403S and LP-018 resistant 10403S mutants at 25°C. LB-MOPS was inoculated 1:100 with an overnight culture, grown to an OD<sub>600</sub> of 0.1 then diluted 1:100 and measured by OD<sub>600</sub> for 12 hours. Data are mean values of three biological replicates and error bars represent standard error.

**Supplemental Table S1.** Additional phage-resistant mutant strains of *Listeria monocytogenes*

| Strain*                                         | Description                                                                                                                                                                                 |
|-------------------------------------------------|---------------------------------------------------------------------------------------------------------------------------------------------------------------------------------------------|
| <i>Listeria monocytogenes</i><br>mutant strains |                                                                                                                                                                                             |
| UTK S1-0001                                     | 10403S mutant; frameshift mutation in <i>LMRG_01613</i> (encodes foldase PrsA2 precursor)                                                                                                   |
| UTK S1-0002                                     | 10403S mutant; frameshift mutation in <i>LMRG_01613</i> (encodes foldase PrsA2 precursor)                                                                                                   |
| UTK S1-0003                                     | 10403S mutant; nonsense mutation in <i>LMRG_00278</i> (encodes acid-resistance family protein HdeD), missense mutation in <i>LMRG_01441</i> (encodes a preprotein translocase subunit YajC) |
| UTK S1-0005                                     | 10403S mutant; frameshift mutation in <i>LMRG_00278</i> (encodes acid-resistance family protein HdeD)                                                                                       |
| UTK S1-0006                                     | 10403S mutant; frameshift mutation in <i>LMRG_00278</i> (encodes acid-resistance family protein HdeD)                                                                                       |
| UTK S1-0007                                     | 10403S mutant; nonsense mutation in <i>LMRG_01613</i> (encodes foldase PrsA2 precursor)                                                                                                     |
| UTK S1-0008                                     | 10403S mutant; frameshift mutation in <i>LMRG_01613</i> (encodes foldase PrsA2 precursor)                                                                                                   |
| UTK S1-0009                                     | 10403S mutant; nonsense mutation in <i>LMRG_01613</i> (encodes foldase PrsA2 precursor)                                                                                                     |

\*All strains sourced from this study
